# Supplementary material for: Dietary methionine restriction regulated energy and protein homeostasis by improving thyroid function in high fat diet mice
Source: Royal Society of Chemistry journal article supplement (doi:10.1039/c8fo00685g), 2018-01-01
Supplement: c8fo00685g1.pdf [file c8fo00685g1.pdf]

## 1 Supporting information

### 2 Supplemental Tables

#### 3 Table S1 Compositions of the experimental diets (g/100 g of diet)

| Ingredients                      | CON   | HFD   | LMD   |
|----------------------------------|-------|-------|-------|
| L-arginine                       | 1.12  | 1.12  | 1.12  |
| L-histidine-HCl-H <sub>2</sub> O | 0.33  | 0.33  | 0.33  |
| L-isoleucine                     | 0.82  | 0.82  | 0.82  |
| L-leucine                        | 1.11  | 1.11  | 1.11  |
| L-lysine                         | 1.44  | 1.44  | 1.44  |
| L-methionine <sup>1</sup>        | 0.86  | 0.86  | 0.17  |
| L-phenylalanine                  | 1.16  | 1.16  | 1.16  |
| L-threonine                      | 0.82  | 0.82  | 0.82  |
| L-tryptophan                     | 0.18  | 0.18  | 0.18  |
| L-valine                         | 0.82  | 0.82  | 0.82  |
| L-glutamic acid <sup>1</sup>     | 2.70  | 2.70  | 3.39  |
| L-glycine                        | 2.33  | 2.33  | 2.33  |
| Corn starch                      | 47.25 | 31.25 | 31.25 |
| Maltodextrin                     | 5.00  | 5.00  | 5.00  |
| Dextrose                         | 20.00 | 20.00 | 20.00 |
| Cellulose                        | 5.00  | 5.00  | 5.00  |
| Lard                             | 4.00  | 20.00 | 20.00 |
| Mineral mix <sup>2</sup>         | 3.50  | 3.50  | 3.50  |

|                          |      |      |      |
|--------------------------|------|------|------|
| Vitamin mix <sup>2</sup> | 1.00 | 1.00 | 1.00 |
| Choline bitartrate       | 0.20 | 0.20 | 0.20 |

4 <sup>1</sup>When the methionine content in the diet was decreased, the glutamic acid content was increased  
5 on an equal mass.

6 <sup>2</sup>Mineral mix and Vitamin mix were prepared based on the AIN-93 diet.

7

8 **Table S2** Sequences of primers used in quantitative real-time reverse transcription PCR

| Gene symbol | Forward primer (5'–3')    | Reverse primer (5'–3')    |
|-------------|---------------------------|---------------------------|
| MyoG        | GTAAGGTGTGTAAGAGGAAG      | GCTCAATGTACTGGATGG        |
| PI3K        | TGCTCCGTAGTGGTAGAC        | GTATGCTAGTGTGACATTGAG     |
| Akt         | CGGGCACATCAAGATAACG       | CGTGGTCCTGGTTGTAGAAG      |
| S6K1        | GGCAATGATAGTGAGGAATG      | CGGTCTGAAAGGCATAAATC      |
| 4EBP1       | AGCCGTAGGACGCAATGATG      | GGTATAGACAGAGGCACAAGGAGG  |
| FOXO3a      | TAAGTGTCGTCTTGTGTTTGTTC   | CTTCTGCTTTTAAGTGTGCTAGGGA |
| MAFbx       | AGCATCCAACCTCAAGTCACCCT   | ATCTCCTTCTCCTTTCTTCCACA   |
| MuRF1       | CCTGGACGAGAAGAAGAGCGAG    | TTGGCACTTGAGAGGAAGGTAGC   |
| TPO         | CACTGGTCCTCTGTTTGCATGTAT  | TAGTTCCTGCCTCTGAGCTCTG    |
| C           |                           |                           |
| NIS         | CTTGCTCTTCTTGCCGATCTTCTAC | TGCGTAGATCACGATGCCAGTATA  |
| TGB         | ATCCTGCCACCCAGAATCAA      | GGGGAAAACCTGCTCTGATGGC    |
| TSHR        | GCTTCTCATTGCCTCTGTAGACCT  | AGGGTGATGACCGTCAGTGTGT    |
| C           |                           |                           |

|                |                         |                           |
|----------------|-------------------------|---------------------------|
| DIO2           | CTTCCTCCTAGATGCCTACAAAC | GGCATAATTGTTACCTGATTTCAGG |
| TR $\alpha$ 1  | GGTGCTGCATGGAGATCATG    | GGAATGTTGTGTTTGCGGTG      |
| $\beta$ -actin | GGGTCAGAAGGACTCCTATG    | GTAACAATGCCATGTTCAAT      |

9

10 **Table S3** Systemic endogenous metabolites of mice in urine and plasma

| Keys | Metabolites                    | Moieties                                                                             | $\delta^1\text{H}$ (ppm) and multiplicity | Samples <sup>a</sup> |
|------|--------------------------------|--------------------------------------------------------------------------------------|-------------------------------------------|----------------------|
| 1    | Bile acids                     | CH <sub>3</sub>                                                                      | 0.64(m), 0.75(m)                          | U                    |
| 2    | $\alpha$ -Hydroxy-iso-valerate | $\delta\text{CH}_3$                                                                  | 0.83(d), 0.97(d)                          | U                    |
| 3    | Valerate                       | $\delta\text{CH}_3$ , $\gamma\text{CH}_2$ , $\beta\text{CH}_2$ , $\alpha\text{CH}_2$ | 0.88(t), 1.31(m), 1.61(m), 2.28(t)        | U                    |
| 4    | $\alpha$ -Hydroxybutyrate      | CH <sub>3</sub>                                                                      | 0.89(t)                                   | U                    |
| 5    | Butyrate                       | CH <sub>3</sub>                                                                      | 0.92(t)                                   | U                    |
| 6    | 2-Ketoisocaproate              | CH <sub>3</sub> , CH, CH <sub>2</sub>                                                | 0.93(dd), 2.12(m), 2.59(m)                | U                    |
| 7    | Propionate                     | CH <sub>3</sub> , CH <sub>2</sub>                                                    | 1.06(t), 2.18(q)                          | U, P                 |
| 8    | 2-Keto-isovalerate             | CH <sub>3</sub> , CH <sub>2</sub>                                                    | 1.11(d), 3.03(m)                          | U                    |
| 9    | Isobutyrate                    | CH <sub>3</sub>                                                                      | 1.14(d)                                   | U, P                 |
| 10   | Ethanol                        | CH <sub>3</sub> , CH <sub>2</sub>                                                    | 1.18(t), 3.66(q)                          | U, P                 |
| 11   | 3-Hydroxybutyrate              | $\gamma\text{CH}_3$ , $\alpha\text{CH}_2$ , $\beta\text{CH}$                         | 1.20(d), 2.28(dd), 2.42(dd), 4.16(m)      | U, P                 |
| 12   | Methylmalonate                 | CH <sub>3</sub> , CH                                                                 | 1.24(d), 3.75(m)                          | U                    |
| 13   | Lactate                        | $\beta\text{CH}_3$ , $\alpha\text{CH}$                                               | 1.33(d), 4.13(q)                          | U, P                 |
| 14   | 2-Hydroxyisobutyrate           | CH <sub>3</sub>                                                                      | 1.36(s)                                   | U                    |
| 15   | Alanine                        | $\beta\text{CH}_3$ , $\alpha\text{CH}$                                               | 1.48(d), 3.77(q)                          | U, P                 |
| 16   | Citrulline                     | $\gamma\text{CH}_2$ , $\beta\text{CH}_2$                                             | 1.56(m), 1.82(m)                          | U, P                 |

---

|    |                   |                                                                        |                           |      |
|----|-------------------|------------------------------------------------------------------------|---------------------------|------|
| 17 | Putrescine        | CH <sub>2</sub> , CH <sub>2</sub> -NH <sub>2</sub>                     | 1.78(m), 3.06(t)          | U    |
| 18 | N-Acetylglutamate | γCH <sub>2</sub> , CH <sub>3</sub> , βCH <sub>2</sub>                  | 1.88(m), 2.04(s), 2.07(m) | U    |
| 19 | Acetate           | CH <sub>3</sub>                                                        | 1.92(s)                   | U, P |
| 20 | Acetamide         | CH <sub>3</sub>                                                        | 2.00(s)                   | U    |
| 21 | Acetone           | CH <sub>3</sub>                                                        | 2.24(s)                   | U, P |
| 22 | Acetoacetate      | CH <sub>3</sub>                                                        | 2.28(s)                   | U, P |
| 23 | Pyruvate          | CH <sub>3</sub>                                                        | 2.37(s)                   | U, P |
| 24 | Succinate         | CH <sub>2</sub>                                                        | 2.41(s)                   | U    |
| 25 | α-Ketoglutarate   | βCH <sub>2</sub> , γCH <sub>2</sub>                                    | 2.45(t), 3.01(t)          | U    |
| 26 | Citrate           | CH <sub>2</sub>                                                        | 2.55(d), 2.68(d)          | U, P |
| 27 | Methylamine       | CH <sub>3</sub>                                                        | 2.60(s)                   | U, P |
| 28 | Dimethylamine     | CH <sub>3</sub>                                                        | 2.71(s)                   | U, P |
| 29 | Sarcosine         | CH <sub>3</sub> , CH <sub>2</sub>                                      | 2.76(s), 3.65(s)          | U    |
| 30 | Succinimide       | CH <sub>2</sub>                                                        | 2.78(s)                   | U    |
| 31 | Methylguanidine   | CH <sub>3</sub>                                                        | 2.84(s)                   | U    |
| 32 | Trimethylamine    | CH <sub>3</sub>                                                        | 2.88(s)                   | U, P |
| 33 | Dimethylglycine   | CH <sub>3</sub>                                                        | 2.93(s)                   | U    |
| 34 | Creatine          | CH <sub>3</sub> , CH <sub>2</sub>                                      | 3.04(s), 3.93(s)          | U, P |
| 35 | Creatinine        | CH <sub>3</sub> , CH <sub>2</sub>                                      | 3.05(s), 4.05(s)          | U, P |
| 36 | Ethanolamine      | CH <sub>2</sub>                                                        | 3.13(t)                   | U    |
| 37 | Malonate          | CH <sub>2</sub>                                                        | 3.16(s)                   | U    |
| 38 | Choline           | OCH <sub>2</sub> , NCH <sub>2</sub> , N(CH <sub>3</sub> ) <sub>3</sub> | 4.07(t), 3.53(t), 3.20(s) | U, P |

---

|    |                        |                                                                        |                                                                      |      |
|----|------------------------|------------------------------------------------------------------------|----------------------------------------------------------------------|------|
| 39 | Phosphocholine         | N(CH <sub>3</sub> ) <sub>3</sub> , OCH <sub>2</sub> , NCH <sub>2</sub> | 3.23(s), 4.21(t), 3.61(t)                                            | U    |
| 40 | Taurine                | -CH <sub>2</sub> -S, -CH <sub>2</sub> -NH <sub>2</sub>                 | 3.27(t), 3.43(t)                                                     | U, P |
| 41 | Trimethylamine-N-oxide | CH <sub>3</sub>                                                        | 3.30(s)                                                              | U, P |
| 42 | Phenylacetate          | CH <sub>2</sub> , 2,6-CH, 4-CH, 3,5-CH                                 | 3.55(s), 7.28(m), 7.29(m), 7.32(m)                                   | U    |
| 43 | Glycine                | CH <sub>2</sub>                                                        | 3.57(s)                                                              | U, P |
| 44 | p-Hydroxyphenylacetate | 6-CH, 2-CH, 3,5-CH                                                     | 3.6(s), 6.87(d), 7.15(d)                                             | U    |
| 45 | Phenylacetyglycine     | 2,6-CH, 3,5-CH, 7-CH, 10-<br>CH                                        | 7.31(t), 7.37(m), 7.42(m), 3.68(s)                                   | U    |
| 46 | Guanidoacetate         | CH <sub>2</sub>                                                        | 3.81(s)                                                              | U    |
| 47 | Hippurate              | CH <sub>2</sub> , 3,5-CH, 4-CH, 2,6-CH                                 | 3.97(d), 7.57(t), 7.65(t), 7.84(d)                                   | U    |
| 48 | Glycolate              | CH <sub>2</sub>                                                        | 3.96(s)                                                              | U    |
| 49 | Inosine                | 8-CH, 2-CH, 1-CH, 2-CH,<br>3-CH, 4-CH, CH <sub>2</sub>                 | 8.24(s), 8.35(s), 6.05(d), 4.79(m),<br>4.46(dd), 4.28(m), 3.87(dd)   | U    |
| 50 | N-Methylnicotinamide   | CH <sub>3</sub> , 5-CH, 4-CH, 6-CH, 2-<br>CH                           | 4.51(s), 8.19(m), 8.91(m), 8.97(d),<br>9.28(s)                       | U    |
| 51 | β-Glucose              | 1-CH, 2-CH, 3-CH, 4-CH, 5-<br>CH, 6-CH                                 | 4.65(d), 3.25(dd), 3.49(t), 3.41(dd),<br>3.46(m), 3.73(dd), 3.90(dd) | U, P |
| 52 | α-Glucose              | 1-CH, 2-CH, 3-CH, 4-CH, 5-<br>CH, 6-CH                                 | 5.24(d), 3.54(dd), 3.71(dd), 3.42(dd),<br>3.84(m), 3.78(m)           | U, P |
| 53 | 4-Cresol glucuronide   | CH <sub>3</sub> , 2, 6-CH, 3, 5-CH, 5-<br>CH, 4-CH, 3-CH               | 2.30(s), 7.05(d), 7.23(d), 5.07(d),<br>3.61(m), 3.89(m)              | U    |
| 54 | Allantoin              | CH                                                                     | 5.40(s), 6.05(s)                                                     | U    |

|    |                                    |                                         |                                                  |      |
|----|------------------------------------|-----------------------------------------|--------------------------------------------------|------|
| 55 | Cis-aconitate                      | CH <sub>2</sub> , CH                    | 3.12(s), 5.68(s)                                 | U    |
| 56 | Urea                               | NH <sub>2</sub>                         | 5.80(s)                                          | U    |
| 57 | Orotate                            | CH                                      | 6.19(s)                                          | U    |
| 58 | Fumarate                           | CH, CH <sub>3</sub>                     | 6.53(s)                                          | U, P |
| 59 | Trans-aconitate                    | CH <sub>2</sub> , CH                    | 3.44(s), 6.60(s)                                 | U    |
| 60 | N1-methyl-4-pyridone-5-carboxamide | N-CH <sub>3</sub> , 3-CH, 2-CH, 6-CH    | 3.89(s), 6.71(d), 7.83(dd), 8.55(d)              | U    |
| 61 | N1-methyl-2-pyridone-5-carboxamide | N-CH <sub>3</sub> , 3-CH, 4-CH, 6-CH    | 3.64(s), 6.67(d), 7.96(dd), 8.33(d)              | U    |
| 62 | 4-Hydroxyphenylpyruvate            | CH <sub>2</sub> , 3, 5-CH, 2, 6-CH      | 4.01(s), 6.81(m), 7.18(m)                        | U    |
| 63 | 2-(4-Hydroxyphenyl)propanoate      | CH <sub>3</sub> , CH, 3, 5-CH, 2, 6-CH  | 1.37(d), 3.58(q), 6.83(m), 7.18(m)               | U    |
| 64 | 3-Methylhistidine                  | 4-CH, 2-CH                              | 7.12(s), 7.67(s)                                 | U    |
| 65 | Indoxyl sulfate                    | 4-CH, 5-CH, 6-CH, 7-CH, CH <sub>3</sub> | 7.51 (m), 7.22 (m), 7.28 (m), 7.71 (m), 7.37 (s) | U    |
| 66 | m-Hydroxyphenylacetate             | 6-CH, 4-CH, 3-CH                        | 6.92(m), 7.05(d), 7.27(t)                        | U    |
| 67 | Nicotinate                         | 2,6-CH, 4-CH, 5-CH                      | 8.62(d), 8.25(d), 7.50(dd)                       | U    |
| 68 | Guanine                            | CH                                      | 7.68(s)                                          | U    |
| 69 | 4-Aminohippurate                   | CH <sub>2</sub>                         | 7.71(d)                                          | U    |
| 70 | Nicotinamide N-oxide               | 5-CH, 6-CH, 2-CH, 4-CH                  | 7.74(m), 8.12(m), 8.75(m), 8.49(m)               | U    |
| 71 | Formate                            | CH                                      | 8.46(s)                                          | U, P |

|    |                          |                                                                                                      |                                                         |   |
|----|--------------------------|------------------------------------------------------------------------------------------------------|---------------------------------------------------------|---|
| 72 | Trigonelline             | 2-CH, 4-CH, 6-CH, 5-CH,<br>CH <sub>3</sub>                                                           | 9.12(s), 8.85(m), 8.83(dd), 8.19(m),<br>4.44(s)         | U |
| 73 | LDL/ VLDL                | CH <sub>3</sub> (CH <sub>2</sub> ) <sub>n</sub> , CH <sub>3</sub> CH <sub>2</sub> CH <sub>2</sub> C= | 0.88(m), 0.90(t)                                        | P |
| 74 | Leucine                  | αCH, βCH <sub>2</sub> , γCH, δCH <sub>3</sub>                                                        | 3.73(t), 1.72(m), 0.96(d), 0.91(d)                      | P |
| 75 | Isoleucine               | αCH, βCH, βCH <sub>3</sub> , γCH <sub>2</sub> ,<br>δCH <sub>3</sub>                                  | 3.68(d), 1.99(m), 1.01(d), 1.26(m),<br>1.47(m), 0.94(t) | P |
| 76 | Valine                   | αCH <sub>3</sub> , βCH, γCH <sub>3</sub>                                                             | 3.62(d), 2.28(m), 0.99(d), 1.04(d)                      | P |
| 77 | Lipids                   | CH <sub>2</sub> *CH <sub>2</sub> CO, CH <sub>2</sub> -C=C<br>CH <sub>2</sub> -C=O, CH-O-CO           | 1.29(m), 1.58(m), 2.02(m)<br>2.25(m), 2.77(m)           | P |
| 78 | Threonine                | αCH, βCH, γCH <sub>3</sub>                                                                           | 1.32(d), 4.25(m), 3.58(d)                               | P |
| 79 | Lysine                   | αCH, βCH <sub>2</sub> , γCH <sub>2</sub> , δCH <sub>2</sub>                                          | 3.77(t), 1.89(m), 1.73(m)                               | P |
| 80 | N-Acetyl glycoprotein    | CH <sub>3</sub>                                                                                      | 2.05(s)                                                 | P |
| 81 | O-Acetyl glycoprotein    | CH <sub>3</sub>                                                                                      | 2.09(s)                                                 | P |
| 82 | Glutamate                | αCH, βCH <sub>2</sub> , γCH <sub>2</sub>                                                             | 3.75(m), 2.12(m), 2.35(m)                               | P |
| 83 | Methionine               | αCH, βCH <sub>2</sub> , γCH <sub>2</sub> , S-CH <sub>3</sub>                                         | 3.87(t), 2.16(m), 2.65(t), 2.14(s)                      | P |
| 84 | Glutamine                | αCH, βCH <sub>2</sub> , γCH <sub>2</sub>                                                             | 3.68(t), 2.15(m), 2.45(m)                               | P |
| 85 | Albumin                  | Lysyl-CH <sub>2</sub>                                                                                | 3.02(s)                                                 | P |
| 86 | Glycerophosphorylcholine | N-(CH <sub>3</sub> ) <sub>3</sub> , OCH <sub>2</sub> , NCH <sub>2</sub>                              | 3.22(s), 4.33(t), 3.51(t)                               | P |
| 87 | Betaine                  | CH <sub>3</sub> , CH <sub>2</sub>                                                                    | 3.28(s), 3.90(s)                                        | P |
| 88 | Proline                  | βCH <sub>2</sub> , γCH <sub>2</sub> , δCH <sub>2</sub>                                               | 2.02-2.33(m), 2.00(m), 3.35(t)                          | P |
| 89 | Ornithine                | CH <sub>2</sub> , αCH                                                                                | 3.80(s), 3.79(t)                                        | P |
| 90 | Myo-Inositol             | 5-CH, 4,6-CH, 2-CH                                                                                   | 3.30(t), 3.63(t), 4.06(t)                               | P |

|    |                    |                                 |                              |   |
|----|--------------------|---------------------------------|------------------------------|---|
| 91 | Unsaturated lipids | =C-CH <sub>2</sub> -C=, -CH=CH- | 5.19(m), 5.31(m)             | P |
| 92 | 1-Methylhistidine  | 4-CH, 2-CH                      | 7.05(s), 7.75(s)             | P |
| 93 | 3-Methylhistidine  | 4-CH, 2-CH                      | 7.07(s), 7.67(s)             | P |
| 94 | Phenylalanine      | 2,6-CH, 3,5-CH, 4-CH            | 7.32 (m), 7.42 (m), 7.37 (m) | P |
| 95 | Tyrosine           | 2,6-CH, 3,5-CH                  | 7.19(dd), 6.90(d)            | P |

11 U, urine; P, plasma; s, singlet; d, doublet; t, triplet; q, quartet; dd, doublet of doublets; m, multiplet;

12 LDL, low density lipoprotein; VLDL, low density lipoprotein.

13

#### 14 Supplemental Figures

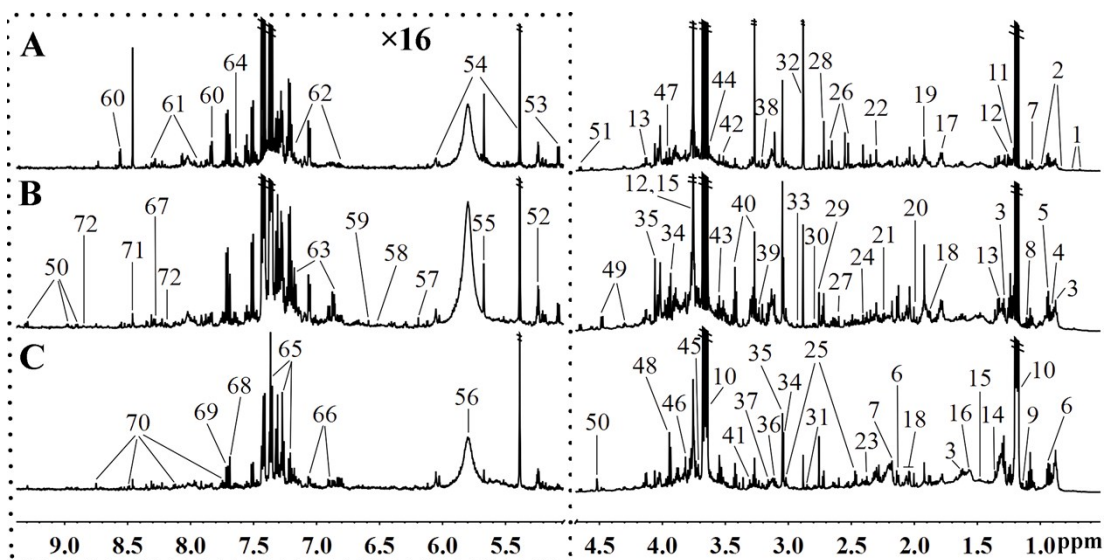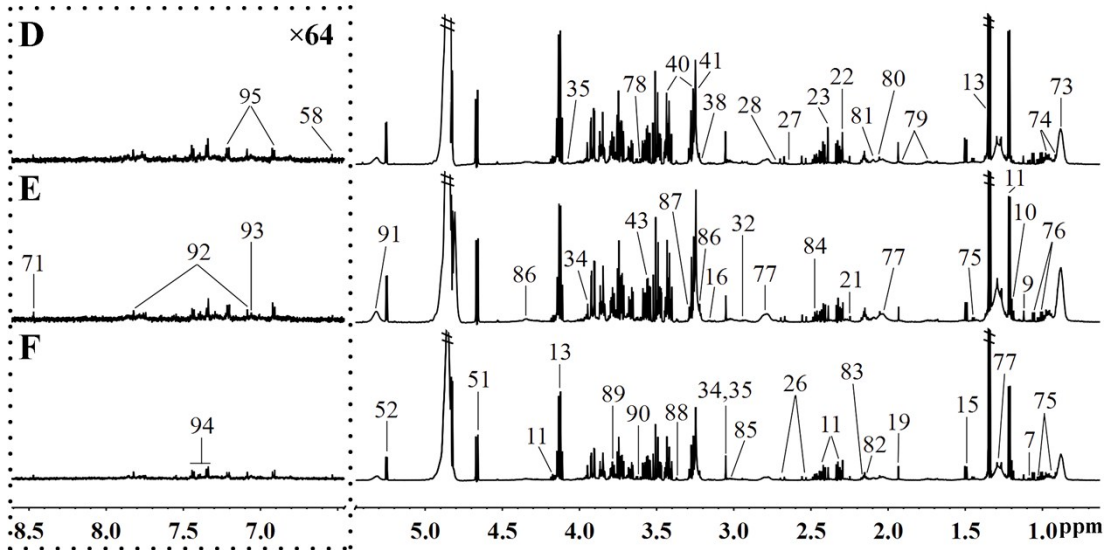

15



16 **Fig. S1** Representative 600 MHz  $^1\text{H}$  NMR spectra of urine (A, CON; B, HFD; C, MRD) and  
17 plasma (D, CON; E, HFD; F, MRD) samples. CON, the control group; HFD, the high fat diet group;  
18 MRD, the high fat + methionine-restricted diet group. The dashed boxes were perpendicularly  
19 enlarged 16 times in the spectra of urine samples, 64 times in the plasma samples. The keys for  
20 metabolites are given in Table S3.
